# Supplementary material for: RNA-Seq-Based Gene Expression Pattern and Morphological Alterations in Chick Thymus during Postnatal Development
Source: Int J Genomics. 2019 Apr 21;2019:6905194. doi: 10.1155/2019/6905194 (PMC6501151; doi:10.1155/2019/6905194)
Supplement: Supplementary Materials — Venn diagrams showing downregulated (a) and upregulated (b) DGEs at different time points compared with the 0 week. H1, H2, and H3 denote three biological replicates. [file 6905194.f1.zip]

Archive with 2 entries (2 files):
- 6905194.f1/supplementary file 1 (down).svg
- 6905194.f1/supplementary file 1(up).svg
